# Supplementary figures and images for: Gender-specific prevalence of metabolic-associated fatty liver disease among government employees in Tianjin, China: a cross-sectional study
Source: HighWire-hosted journal article supplement (doi:10.1136/bmjopen-2021-056260), 2021-12-01

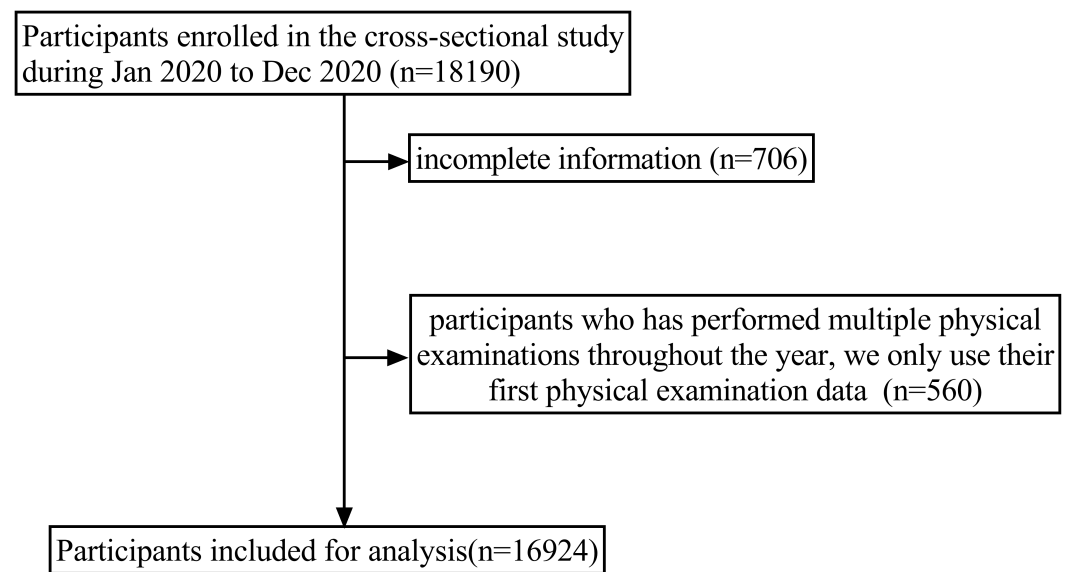

Supplementary figure 1. Flowchart showing the selection of the studied population

Supplement: bmjopen-2021-056260supp001_data_supplement.pdf [file bmjopen-2021-056260supp001_data_supplement.pdf]
